# Supplementary material for: Suppression of epithelial–mesenchymal transition and apoptotic pathways by miR-294/302 family synergistically blocks let-7-induced silencing of self-renewal in embryonic stem cells
Source: PubMed Central journal article supplement — Cell Death Differ. 2014 Dec 12;22(7):1158–69. doi: 10.1038/cdd.2014.205 (PMC4572863; doi:10.1038/cdd.2014.205), 2014-12-12
Supplement: cdd2014205x1.pdf [file cdd2014205x1.pdf]

**SUPPLEMENTARY FIGURE LEGENDS**

**Supplementary Figure 1.** *Dgcr8*<sup>-/-</sup> ESCs display characteristics of mesenchymal cells. **(A)** Morphology of wild type and *Dgcr8*<sup>-/-</sup> ESCs at different passages off mouse embryonic fibroblast feeders. **(B)** Examples of spread cells (red) and un-spread cells (green) marked by the Cell-IQ Analyzer program. Blue dots indicate cell debris or unknown particles. **(C)** Heat-map showing mRNA expression changes of epithelial and mesenchymal markers in wild type and *Dgcr8*<sup>-/-</sup> ESCs. Shown are log<sub>2</sub> fold changes relative to the mean of all samples. Heatmap is generated with pheatmap package in R. **(D)** Western analysis of CDH1 and CDH2. GAPDH was used as a loading control. Representative gels are shown. Data were normalized to wild type ESCs. Shown are mean ± range. n=2.

**Supplementary Figure 2.** MiR-294/302 and let-7 antagonistically regulate the EMT in ESCs. **(A)** Morphology of mock, control mimic, miR-293, miR-294, miR-295, and miR-302a transfected *Dgcr8*<sup>-/-</sup> ESC colonies. **(B)** Number of cells attached in 40 min after plating. **(C)** Western analysis of CDH1 and CDH2. GAPDH was used as a loading control. Representative gels are shown. Data were normalized to wild type ESCs. Shown are mean ± range. n=2. **(D)** qRT-PCR analysis of epithelial and mesenchymal markers in mock and let-7c transfected *Dgcr8*<sup>-/-</sup> ESCs on days 1, 2, and 3. The β-actin gene was used as a control. For each gene, data were normalized to the mRNA level of mock transfected *Dgcr8*<sup>-/-</sup> ESCs. Shown are mean ± SD, n = 3. **(E)** Western analysis of CDH1 and CDH2 in let-7c transfected *Dgcr8*<sup>-/-</sup> ESCs. Actin was used as a loading control.

**Supplementary Figure 3.** Activation of the EMT or apoptotic pathways inhibits the pluripotency program in wild type ESCs. **(A)** Western analysis of CDH1 and CDH2 in Snai1 overexpressing ESCs. Actin was used as a loading control. **(B)** qRT-PCR analysis of pluripotency markers in wild type ESCs without (-Dox) or with (+Dox) Snai1 overexpression. The  $\beta$ -actin gene was used as a control. Data were normalized to wild type ESCs without Snai1 overexpression. Shown are mean  $\pm$ SD, n = 3. **(C)** qRT-PCR analysis of pluripotency markers in wild type ESCs without or with PAC1 treatment. The  $\beta$ -actin gene was used as a control. Data were normalized to wild type ESCs without PAC1 treatment. Shown are mean  $\pm$ SD, n = 3.

**Supplementary Figure 4.** Identification of mRNA targets of miR-294 that may regulate EMT process in ESCs. **(A)** Strategy to identify miR-294 targets. **(B)** Luciferase reporter assays. Shown are mean  $\pm$ SD, n=4-8. P value < 0.05 for solid triangle and round dots. **(C)** qRT-PCR analysis of candidate targets in wild type and *Dgcr8*<sup>-/-</sup> ESCs. **(D)** qRT-PCR analysis of candidate targets in mock and miR-294 transfected *Dgcr8*<sup>-/-</sup> ES cells. For both **C** and **D**, the  $\beta$ -actin gene was used as a control. Shown are mean  $\pm$ SD, n=3. **(E)** Western analysis of GSK3A, GSK3B and VIM. GAPDH was used as a loading control. Representative gels are shown. Data were normalized to wild type (upper panels) or mock transfected *Dgcr8*<sup>-/-</sup> ESCs (lower panels).

**Supplementary Figure 5.** Identification of mRNA targets of miR-294/302. **(A)** qRT-PCR analysis for knockdown efficiency of siRNAs to candidate miR-294 targets. The  $\beta$ -actin gene was used as a control. For each gene, data were normalized to control mimic transfected *Dgcr8*<sup>-/-</sup> ESCs. n=1-2. For n=2, shown are mean  $\pm$ SD. Two sets of siRNAs were used except for Vim.

(B) Colony morphology of *Dgcr8*<sup>-/-</sup> ESCs mock transfected or transfected with Mmp23 siRNAs after 48 hours. (C) Cell attachment analysis. Shown are mean  $\pm$ SD, n=6-9.

**Supplementary Figure 6.** Combined suppression of the EMT and apoptotic pathways antagonizes multiple differentiation-inducing miRNAs. (A) Western analysis of CDH2 in R&C treated *Dgcr8*<sup>-/-</sup> ESCs. Actin was used as a loading control. Representative gels are shown. Data were normalized to DMSO treated ESCs. Shown are mean  $\pm$ range, n=2. (B) qRT-PCR analysis of the pluripotency markers *Esrrb*, *Klf4*, and *Rex1* in *let-7c* transfected *Bak*<sup>-/-</sup>, *Bax*<sup>-/flox</sup>, *Dgcr8*<sup>-/-</sup> ESCs treated with DMSO, RepSox, or R&C. The  $\beta$ -actin gene was used as a control. For each gene, data were normalized to mock transfected *Bak*<sup>-/-</sup>, *Bax*<sup>-/flox</sup>, *Dgcr8*<sup>-/-</sup> ESCs treated with DMSO. Shown are mean  $\pm$ SD, n = 3. qRT-PCR analysis of the pluripotency markers *Oct4*, *Sox2*, and *Nanog* in miR-26a, miR-99b, miR-193, miR-199a-5p, and miR-218 transfected (C) *Dgcr8*<sup>-/-</sup> ESCs and (D) *Bak*<sup>-/-</sup>, *Bax*<sup>-/flox</sup>, *Dgcr8*<sup>-/-</sup> ESCs treated with DMSO or R&C. The  $\beta$ -actin gene was used as a control. For each gene, data were normalized to mock transfected, DMSO treated ESCs with the same genotype. Shown are mean  $\pm$ SD, n = 3-6. (E) AP staining for miR-26a, miR-99b, and miR-218 transfected *Bak*<sup>-/-</sup>, *Bax*<sup>-/flox</sup>, *Dgcr8*<sup>-/-</sup> ESCs treated with DMSO or R&C. (F) qRT-PCR analysis of epithelial and mesenchymal markers in *Dgcr8*<sup>-/-</sup> ESCs transfected with differentiation-inducing miRNAs. The  $\beta$ -actin gene was used as a control. For each gene, data were normalized to the mRNA level of mock transfected *Dgcr8*<sup>-/-</sup> ESCs. Shown are mean  $\pm$ SD, n = 2. (G) Apoptosis analysis by Annexin V and propidium iodide staining in *Dgcr8*<sup>-/-</sup> ESCs transfected with differentiation- inducing miRNAs. Shown are mean  $\pm$ SD, n = 2.

Supplementary Figure 1

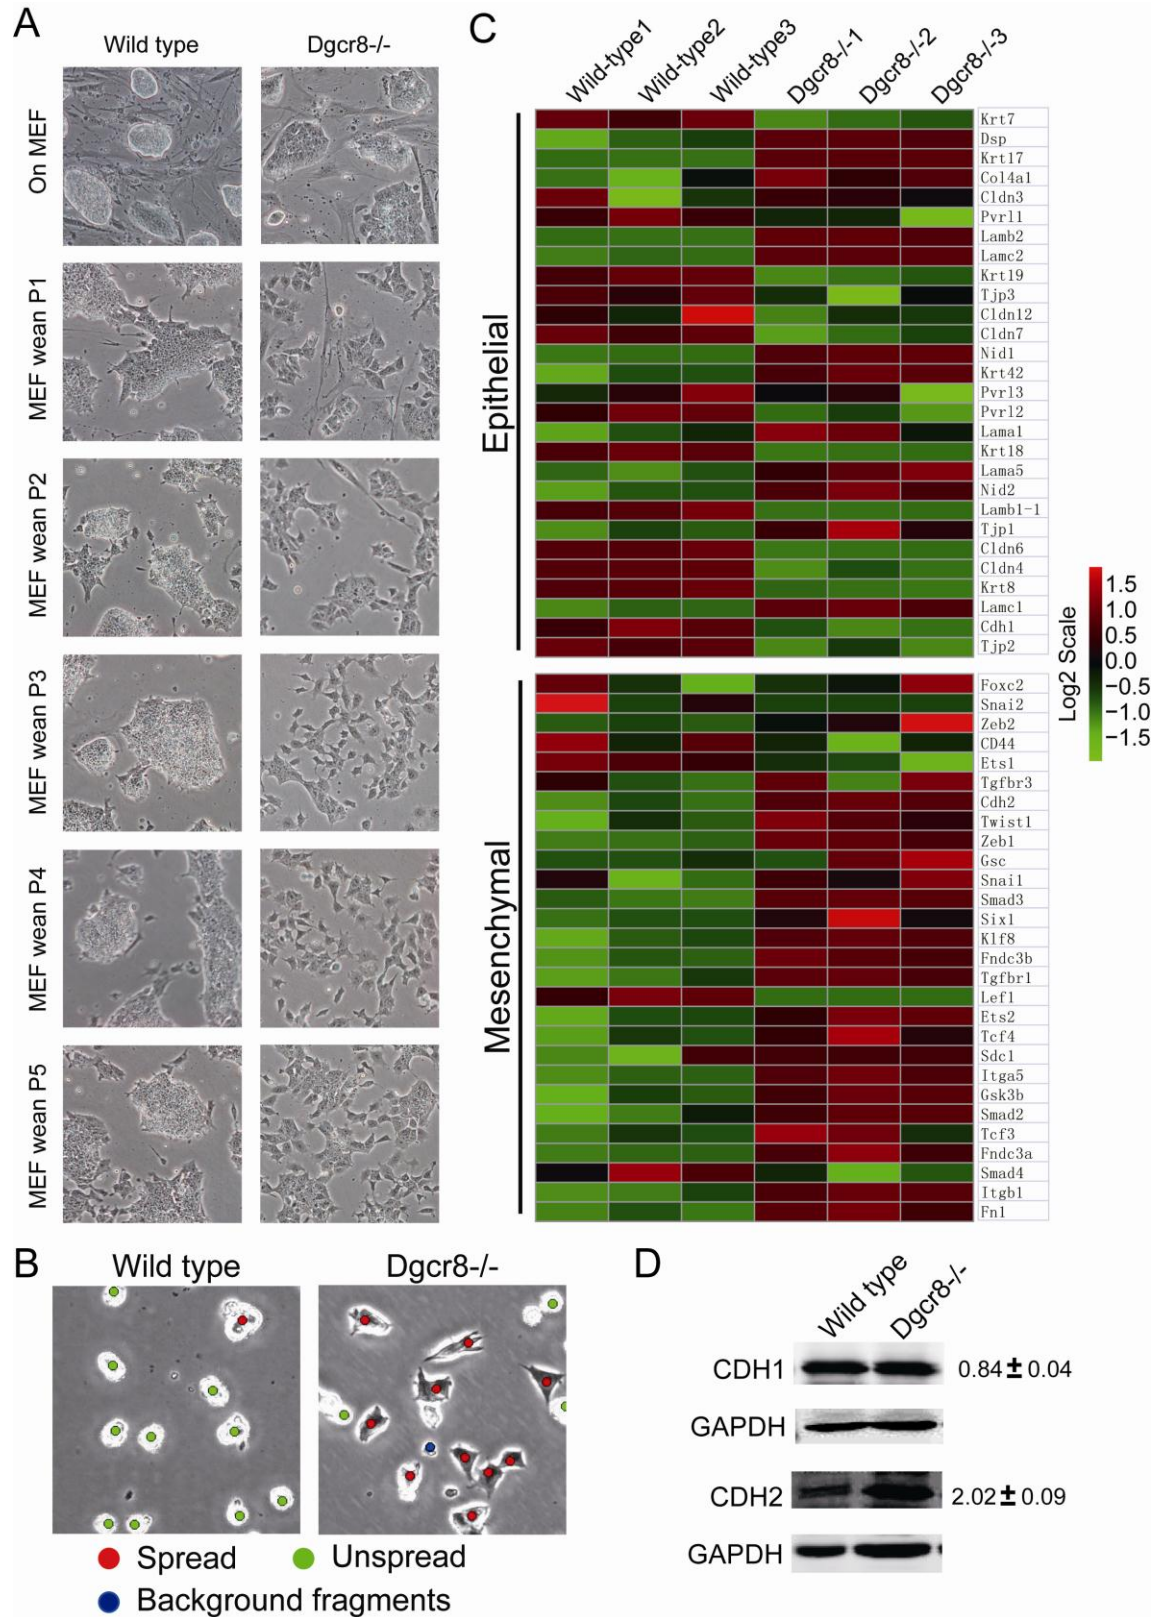

Supplementary Figure 2

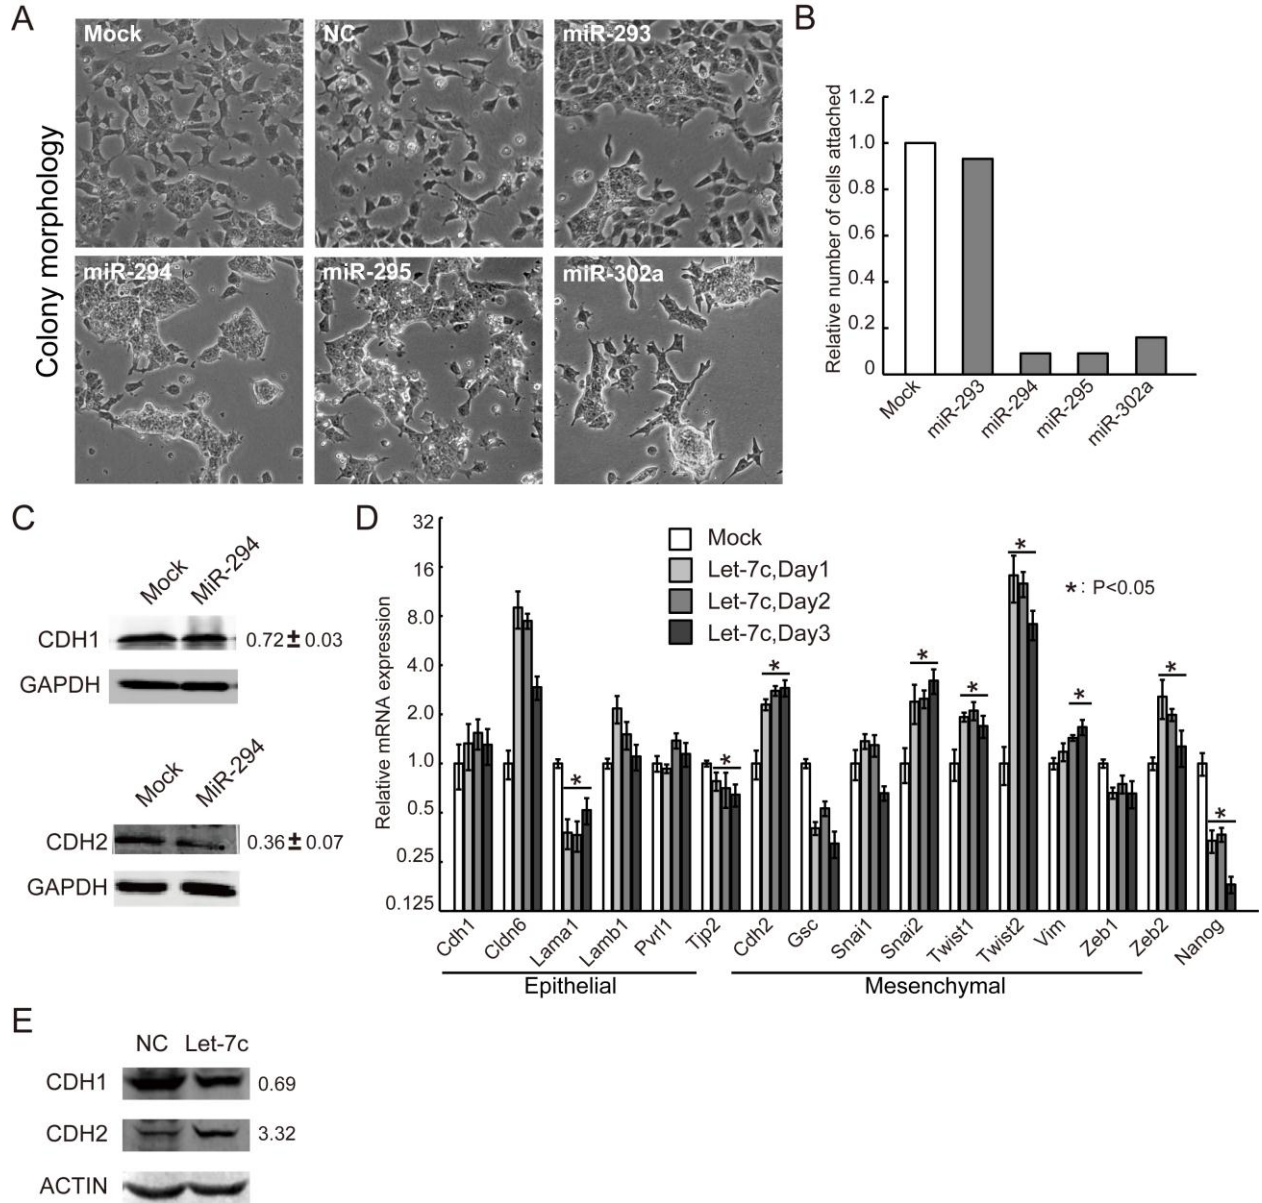

**Supplementary Figure 3**

**A**

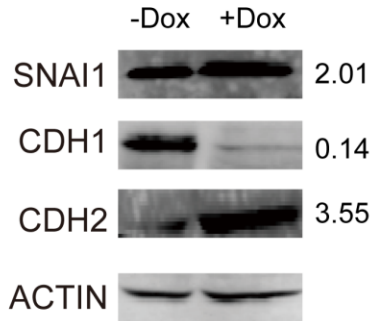

**B**

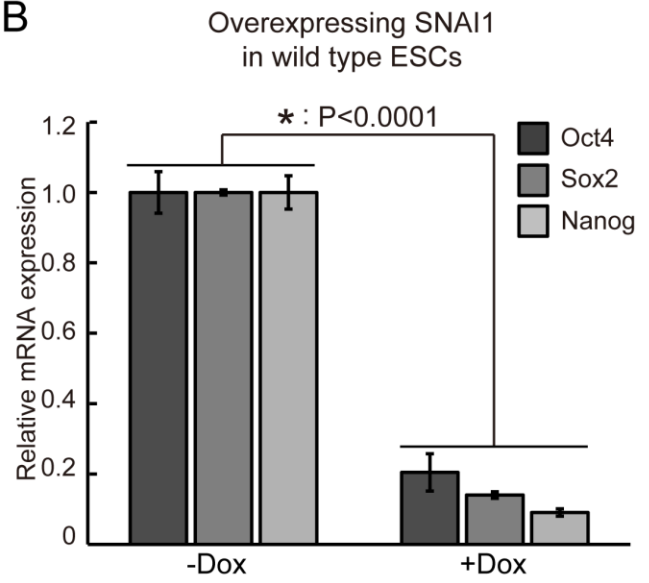

**C**

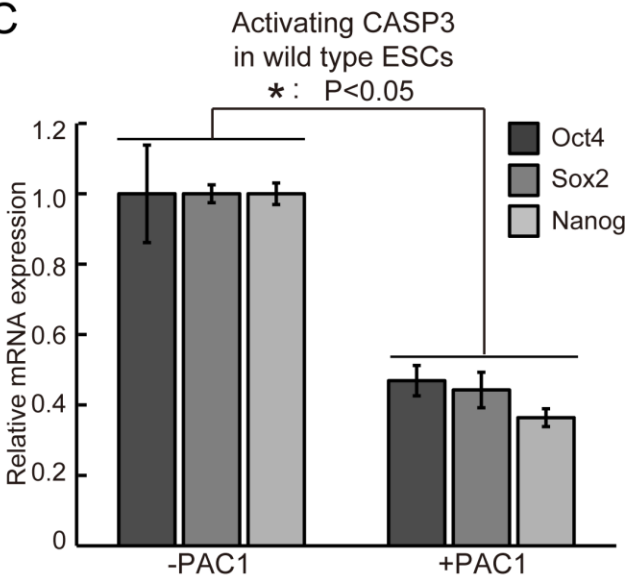

## Supplementary Figure 4

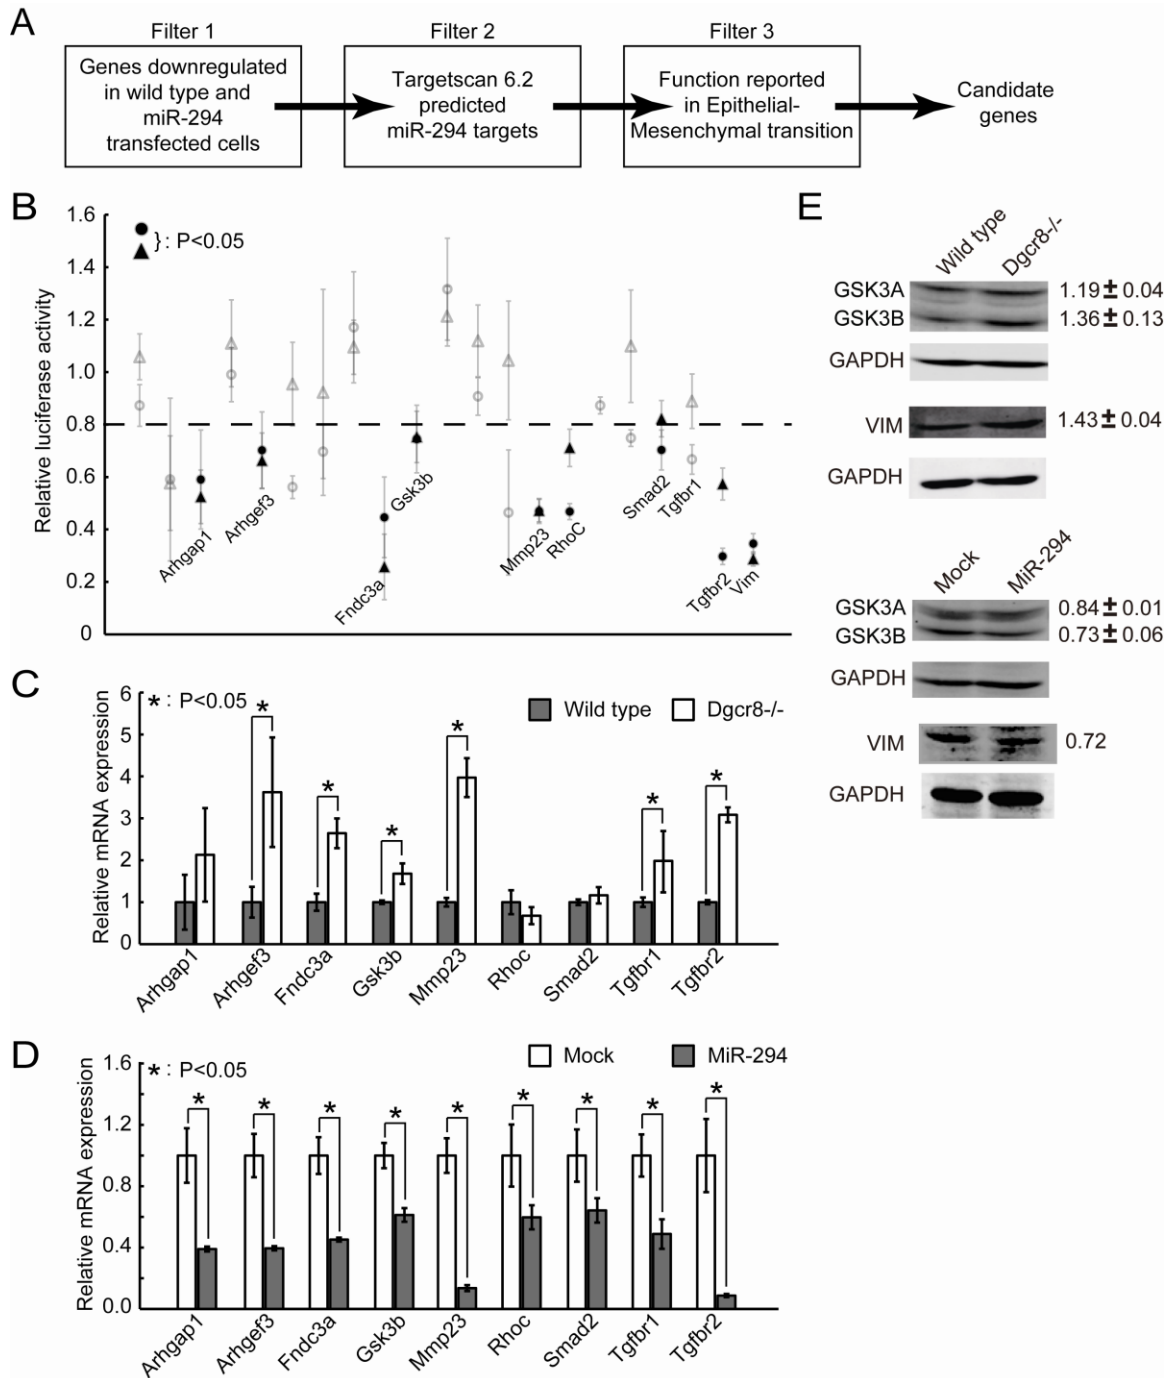

## Supplementary Figure 5

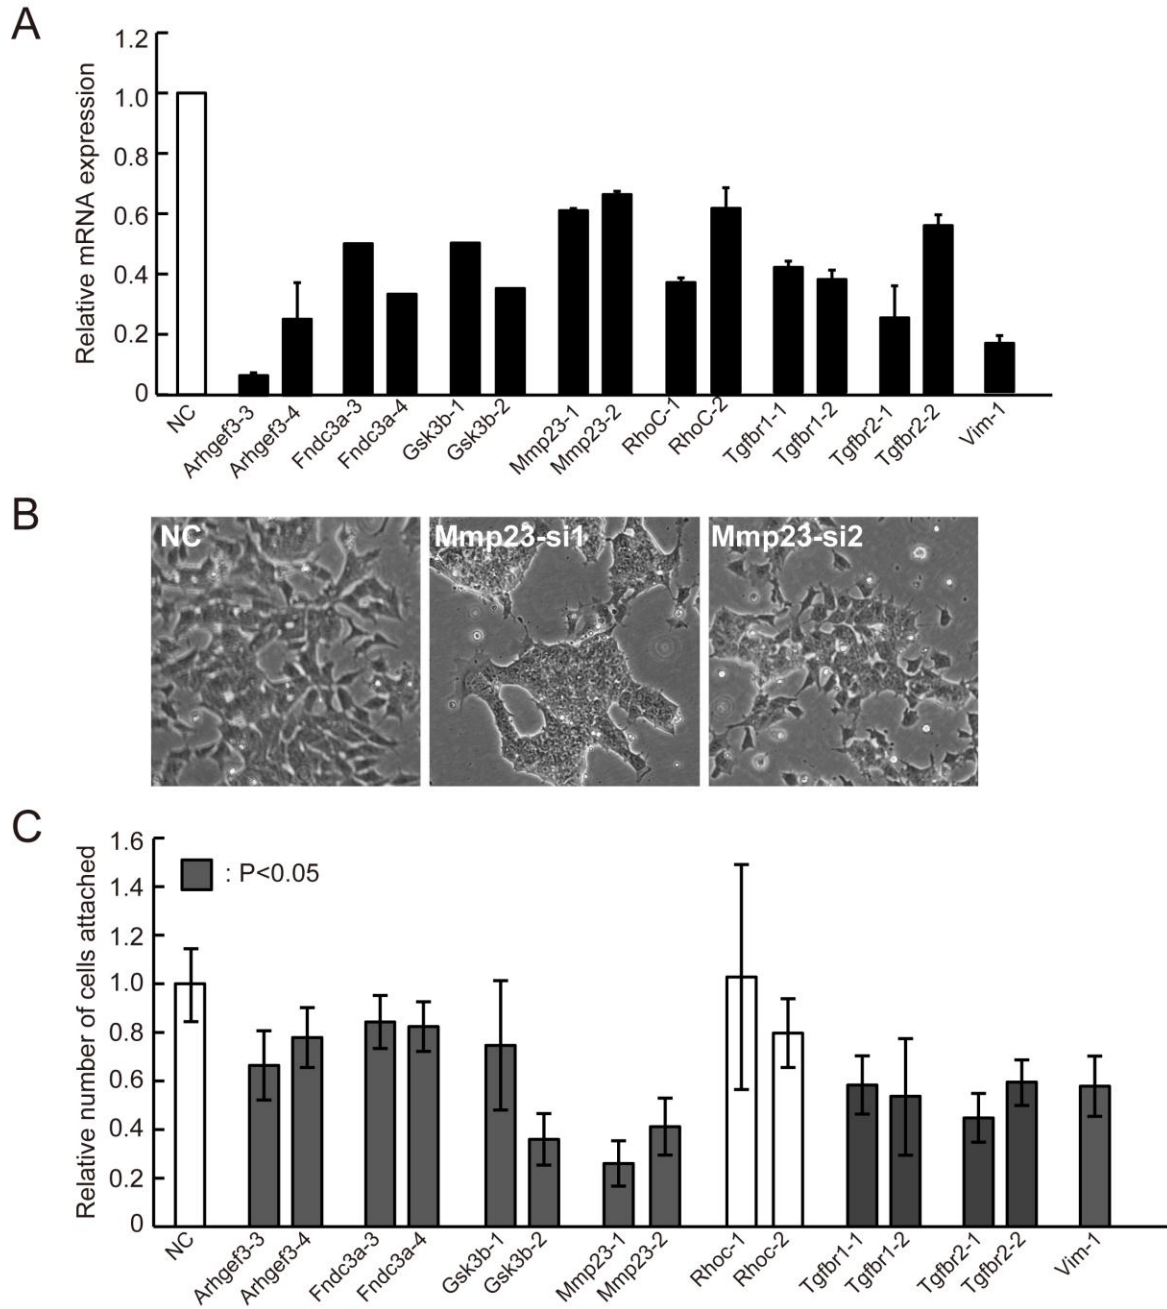



Supplementary Figure 6

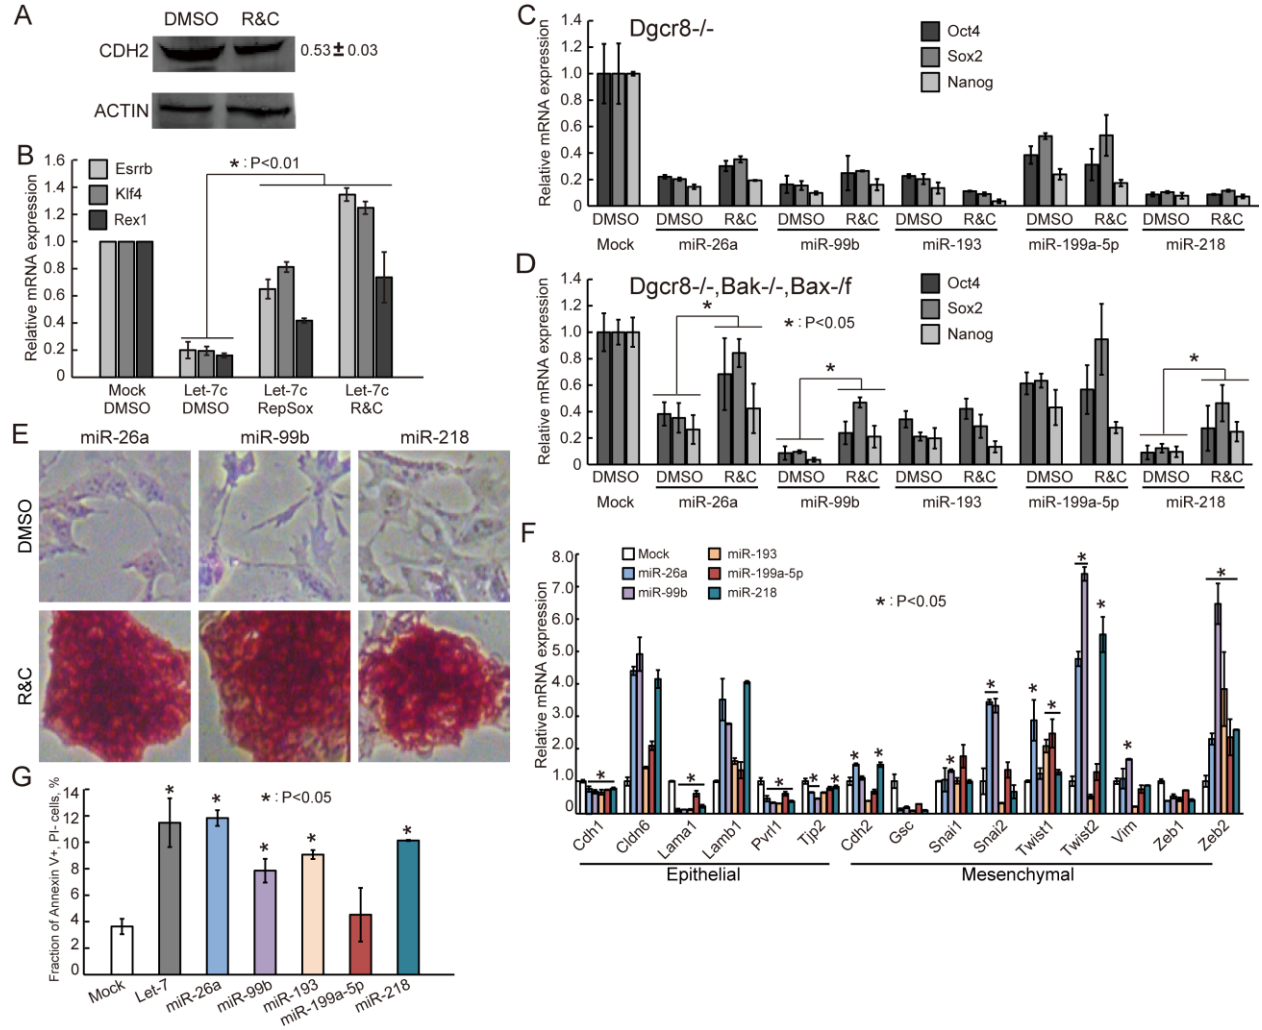

**Supplementary Table 1: Sequences of primers for cloning 3'UTRs of candidate targets**

| Gene     | Primer sequences (5' to 3')                                |
|----------|------------------------------------------------------------|
| Akt2     | 3UTR-F: GACACTCGAGACATCTAGAAGTT                            |
| Akt2     | 3UTR-R: GACCGCGGCCGCTTGTACCGTACAAATA                       |
| Akt3     | 3UTR-F: GACACTCGAGGTTCCCTTTCAGTCTGTTTC                     |
| Akt3     | 3UTR-R: CTTGCGGCCGCGAGATTGACATAGGGCTTTA                    |
| Arhgap1  | 3UTR-F: GACACTCGAGTTATACCTCTCACTG                          |
| Arhgap1  | 3UTR-R: GACCGCGGCCGCTCATTTACATTT                           |
| Arhgap26 | 3UTR-F: GCTACTCGAGACACTCAGGATCTCAGGAT                      |
| Arhgap26 | 3UTR-R: GCTAGCGGCCGCGATCTGTTCATAGGCCACACAT                 |
| Arhgef12 | 3UTR-F: GGCACCTCGAGGCCCTTACTTCTTGCCCTGTTCCC                |
| Arhgef12 | 3UTR-R: GGCACGCGGCCGCGCTGAGTGACCAGGCTTACTG                 |
| Arhgef3  | 3UTR-F: GACACTCGAGCAGAAGACTGTGACCCTGC                      |
| Arhgef3  | 3UTR-R: GACACGCGGCCGCAAGTATTCATTTACACAA                    |
| Arhgef7  | 3UTR-F: GACACTCGAGGCTGACTTTCATTTTCATAGG                    |
| Arhgef7  | 3UTR-R: CTTGCGGCCGCTTAATAATTGCAAGGGTG                      |
| Fndc3a   | 3UTR-F: GGCACCTCGAGGTGGCATTTCAGACTGGCATTGA                 |
| Fndc3a   | 3UTR-R: GACACGCGGCCGCGAGATACTTTTGTACATAGTTTATGTATTC        |
| Gsk3b    | 3UTR-F: GGCACCTCGAGGCGGGAAAGACCAGCACTTAC                   |
| Gsk3b    | 3UTR-R: GGCACGCGGCCGCGGACAAGCTCACTCACAGTGG                 |
| Itga5    | 3UTR-F: GACACTCGAGTGATCTCAGACTCATGAT                       |
| Itga5    | 3UTR-R: GACAGCGGCCGCTTGCAACAGAGTTTA                        |
| Itgav    | 3UTR-F: GCTACTCGAGCACCCAGCAGTCTCAGT                        |
| Itgav    | 3UTR-R: GCTAGCGGCCGCGCAGGGAGTTGCACACGCTT                   |
| Itgb3    | 3UTR-F: GACACTCGAGTGAGACCATCTTCAGATGA                      |
| Itgb3    | 3UTR-R: CTTGCGGCCGCGGAAAGCACATTTTAATTC                     |
| Mmp23    | 3UTR-F: GGCACCTCGAGCACTGCTCAGAGCCTCTGTGCTGGAAGGCAGCAGATAAA |
| Mmp23    | 3UTR-R: GGCACGCGGCCGCTCAGAGAGAAAGTGCTTTATCTGCTGCCTCCAGCACA |
| Rock2    | 3UTR-F: GTGTAGATCCTAGTGAGACAT                              |
| Rock2    | 3UTR-R: GCTAGCGGCCGCGATGACATCACCTCATCTACT                  |
| Rragd    | 3UTR-F: GCTACTCGAGAAGTGTCCAGGAGCCTGAGT                     |
| Rragd    | 3UTR-R: GCTAGCGGCCGCGCACTGTCCAGCTACAACAT                   |
| Smad2    | 3UTR-F: GGCACCTCGAGGCTGGTTGCAGTGGTAAACACTA                 |
| Smad2    | 3UTR-R: GGCACGCGGCCGCGACCTTCAACGCCAACTACTC                 |
| Tgfbr1   | 3UTR-F: GGCACCTCGAGCACCGTGGGAAGTCTGCTCT                    |
| Tgfbr1   | 3UTR-R: GACACGCGGCCGCGAGGATGAAATTTAAGCATCTCCCTAGC          |
| Tgfbr2   | 3UTR-F: GGCACCTCGAGTCCCTTAGCCAAAGACCAGAGG                  |
| Tgfbr2   | 3UTR-R: GACACGCGGCCGCGAATACATGAATATGGCCGAAGTGTTTC          |
| Vim      | 3UTR-F: GCACACACTTGGTGCAACAGT                              |
| Vim      | 3UTR-R: GAAGCAGTAACAAGTTGGTTCAG                            |
| Fn1      | 3UTR-F: GGCACCTCGAGTCTTTCCAGCCCCACCCTACAAGT                |
| Fn1      | 3UTR-R: GACACGCGGCCGCACTTGTCTTTCCACAGTAGTAAAGCGTT          |
| RhoC     | 3UTR-F: GACACTCGAGCTTCCCCAAAGCTT                           |
| RhoC     | 3UTR-R: GACCGCGGCCGCAACCTTTGACCTTTATTCAT                   |

Note: Fn1 was chosen as a negative control without miR-294 binding site in its 3'UTR; RhoC was not significantly downregulated in wild type ESCs, but was included as it has been shown to be targeted by miR-294. (Subramanyam, D., Lamouille, S., Judson, R. L., Liu, J. Y., Bucay, N., Derynck, R., and Blesch, R. (2011). Multiple targets of miR-302 and miR-372 promote reprogramming of human fibroblasts to induced pluripotent stem cells. *Nat. Biotechnol* 29, 443-8.)

**Supplementary Table 2: Sequences of siRNAs to candidate miR-294 targets**

| <b>Gene</b>  | <b>siRNA sequences (5' to 3')</b>  |
|--------------|------------------------------------|
| Arhgef3-si-3 | sense:GCUUCGAGAUGUUCGGAAATT        |
| Arhgef3-si-3 | anti-sense:UUUCCGAACAUCUCGAAGCTT   |
| Arhgef3-si-4 | sense:GUGCACAGCGGAAACGAAATT        |
| Arhgef3-si-4 | anti-sense:UUUCGUUUCGCGUGGCACTT    |
| Fndc3a-si-3  | sense:CAGCAUAGACCUCGGAGAATT        |
| Fndc3a-si-3  | anti-sense:AUCUCCGAGGUCUAUGCUGTT   |
| Fndc3a-si-4  | sense:GUGAAGAGGUCCUGUACUATT        |
| Fndc3a-si-4  | anti-sense:UAGUACAGGACCUCUUCACCTT  |
| Gsk3b-si-1   | sense:GAUCAUUUGGUGUGGUAUATT        |
| Gsk3b-si-1   | anti-sense:UAUACCACACCAAUAUGAUCTT  |
| Gsk3b-si-2   | sense:GGAGCAAUUAGAGAAAUGTT         |
| Gsk3b-si-2   | anti-sense:CAUUUCUCUAAUUUGCUCCTT   |
| Mmp23-si-1   | sense:GGGAAUGUAGAUGC GCCATT        |
| Mmp23-si-1   | anti-sense:UGGCGCAUCUACAUUUCCCTT   |
| Mmp23-si-2   | sense:GGGAAAGUAUACUGGUACATT        |
| Mmp23-si-2   | anti-sense:UGUACCAGUAUACUUUCCCTT   |
| RhoC-si-1    | sense:CUAUAUAGCCGACAUCGAATT        |
| RhoC-si-1    | anti-sense:UUCGAUGUCGGCUAUAUAGTT   |
| RhoC-si-2    | sense:GGAUCAGUGCCUUUGGCUATT        |
| RhoC-si-2    | anti-sense:UAGCCAAAGGCACUGAUCCTT   |
| Tgfbr1-si-1  | sense:GAUUUAUAGCAGCAGACAATT        |
| Tgfbr1-si-1  | anti-sense:UUGUCUGCUGCUAUAUAAUUCTT |
| Tgfbr1-si-2  | sense:GAACAGAAGUUAAGGCCAATT        |
| Tgfbr1-si-2  | anti-sense:UUGGCCUUAACUUCUGUUCTT   |
| Tgfbr2-si-1  | sense:UGGGAGAAGUGAAGGAUUATT        |
| Tgfbr2-si-1  | anti-sense:UAAUCCUUCACUUCUCCCATT   |
| Tgfbr2-si-2  | sense:GGAGGAAGAACGACAAGAATT        |
| Tgfbr2-si-2  | anti-sense:UUCUUGUCGUUCUUCUCCTT    |
| Vim-si-1     | sense:GUCUUGACCUUGAACGGAAATT       |
| Vim-si-1     | anti-sense:UCCGUUCAAGGUCAAGACTT    |

**Supplementary Table 3: Quantitative RT-PCR primers**

| <b>Gene</b> | <b>Primer sequences (5' to 3')</b> |
|-------------|------------------------------------|
| Actb-F      | CCACCATGTACCCAGGCATT               |
| Actb-R      | CCGATCCACACAGAGTACTT               |
| Arhgap1-F   | CGAAGGAATGTCTTGAGGATGAC            |
| Arhgap1-R   | GAGAAAAAACCGAATGACCTATCA           |
| Arhgef3-F   | CCAGTCCCTCAGAGTCAAGCA              |
| Arhgef3-R   | TTTCCCCCTGCCACTTTCA                |
| Cdh1-F      | GAGCGTGCCCCAGTATCG                 |
| Cdh1-R      | CTGCCTTCAGGTTTTTCATCGA             |
| Cdh2-F      | CTCTTTATCCCGCCGTTTCA               |
| Cdh2-R      | TTGCACAGACAGTTCGATGCTACT           |
| Cldn6-F     | GCCCCACTCTATCATCCAGGACTT           |
| Cldn6-R     | CCCCAGCTCCCGCTTT                   |
| Esrrb-F     | CCTGAGCGGACACACTGCTT               |
| Esrrb-R     | CCCAACTGTCACTGGTCCAT               |
| Fndc3a-F    | AGGAATCTCCAATCACTTGTG              |
| Fndc3a-R    | TCTGTGTGCAGACTGTCAGGTAAG           |
| Gsc-F       | GCTAGCTCCTCGTTGCTTTCTC             |
| Gsc-R       | ACCCCCATACCCTTTTGTC                |
| Gsk3b-F     | CACGGTCTCCAGCATTAGTATCTG           |
| Gsk3b-R     | GCTGCCGGTGGACTTTGA                 |
| Klf4-F      | CTATGCAGGCTGTGGCAAAA               |
| Klf4-R      | TGGTAAGGTTTCTCGCCTGTGT             |
| Lama1-F     | CCCCCACACCCATTCCA                  |
| Lama1-R     | GCAGGATAGCCACCCACATAA              |
| Lamb1-F     | AATCTGAAACGGCAGCTTCTG              |
| Lamb1-R     | CACGTTCTCTCAAGCTTGCT               |
| Mmp23-F     | CACCAACCTTGTTTTCGTTCTG             |
| Mmp23-R     | TGTATCCGTCAGGCAAAAGAAA             |
| Nanog-F     | GCTCAGCACCAGTGGAGTATCC             |
| Nanog-R     | TCCAGATGCGTTCACCAGATAG             |
| Oct4-F      | ATGTTCTTAAGGCTGAGCTGCAA            |
| Oct4-R      | CCGTATCAGTGCACGTTCTGA              |
| Pvrl1-F     | GCCCCACCCCAATATG                   |
| Pvrl1-R     | TCAGCCTCATCCACAGTGAAGT             |
| Rex1-F      | GGTGTGGATGCGGATATGG                |
| Rex1-R      | GATTGTGGAGCCATACATTGCA             |
| RhoC-F      | CGCACCCCTTCTTAGTCTTG               |
| RhoC-R      | GATTTCTGTTATGAATTTCCATTTC          |
| Smad2-F     | TGTGCAGAGCCCCAACTGT                |
| Smad2-R     | CAGCCTGGTGGGATCTTACAC              |
| Snail-F     | CACATCCGAGTGGGTTTGG                |
| Snail-R     | CACGCAGTCGCTGAACGA                 |

|                                        |                              |
|----------------------------------------|------------------------------|
| Snai2-F                                | GGGAGCATAACAGCCCTATTACTGT    |
| <b>Supplementary Table 3 continued</b> |                              |
| Snai2-R                                | GGCCACTGGGTAAAGGAGAGT        |
| Sox2-F                                 | GCAAGTACTGGCAAGACCGTT        |
| Sox2-R                                 | CGATATCAACCTGCATGGACAT       |
| Tgfbr1-F                               | CCAAGGAACAAAGAAATGATTTACAA   |
| Tgfbr1-R                               | TGCCAGTGCTAACCCAGTAGCT       |
| Tgfbr2-F                               | CACTAGTGGACCAGCATTCTGTAAA    |
| Tgfbr2-R                               | GCCATCATCGCTATCCTTCTG        |
| Tjp2-F                                 | CCCCCGCACATGAGTTCTA          |
| Tjp2-R                                 | TGGTGTCTCTGGTAAAGTCTGGAA     |
| Twist1-F                               | GACCTGGTACAGGAAGTCGATGT      |
| Twist1-R                               | TCCAGATCGATGTGGACGTTT        |
| Twist2-F                               | CGCTCCCCTCTGACAAGCT          |
| Twist2-R                               | GAACCTGGTAGAGGAAGTCTATGTACCT |
| Vim-F                                  | ATACTGCTGGCGCACATCAC         |
| Vim-R                                  | CCCTTTCCCCAGTTTTTTAATAGG     |
| Zeb1-F                                 | GCTGGGCCAACTCTTAACAGA        |
| Zeb1-R                                 | CCTGTGATGCGTATCAGAAAAG       |
| Zeb2-F                                 | TTTCCCCCTGCCACTTTCA          |
| Zeb2-R                                 | CCAGTCCTGGGTATGGTCGTA        |
